# Supplementary material
Source: MDPI journal article supplement (https://www.mdpi.com/2673-4060/2/1/6)
Supplement: s1 [file s1]

| Factors                                | B      | SE    | P     |
|----------------------------------------|--------|-------|-------|
| Age                                    | -0.016 | 0.02  | 0.426 |
| Gender                                 | -0.374 | 0.51  | 0.463 |
| Family size                            | 0.061  | 0.124 | 0.622 |
| Distance from house to lake            | 0.009  | 0.12  | 0.344 |
| Marital status(married=1)              | -1.388 | 0.931 | 0.136 |
| Education                              | 0.111  | 0.068 | 0.105 |
| Major occupation                       | 0.298  | 0.23  | 0.194 |
| Income                                 | 0.657  | 0.373 | 0.078 |
| Living time in the area                | 0.023  | 0.015 | 0.138 |
| Ownership of house                     | -0.797 | 0.964 | 0.408 |
| Knowledge about environmental services | 1.421  | 0.555 | 0.01  |
| Knowledge about PES                    | 0.556  | 1.155 | 0.63  |

S 1:Logistic regression examining correlation between socio-demographic variables and positive attitudes toward PES implementation in Begnas lake(Upstream)

*N=97,B=logistic correlation coefficient, SE=standard error, p=significance*

| Factors                                | B      | SE    | P     |
|----------------------------------------|--------|-------|-------|
| Age                                    | -0.077 | 0.034 | 0.027 |
| Gender                                 | 0.311  | 0.775 | 0.687 |
| Family size                            | -0.316 | 0.177 | 0.074 |
| Distance from house to lake            | 0.085  | 0.042 | 0.043 |
| Marital status                         | -1.58  | 1.028 | 0.124 |
| Education                              | 0.233  | 0.079 | 0.003 |
| Major occupation                       | -0.482 | 0.275 | 0.079 |
| Income                                 | -0.377 | 0.513 | 0.462 |
| Living time in the area                | 0.05   | 0.021 | 0.02  |
| Knowledge about environmental services | 1.725  | 1.362 | 0.205 |
| Knowledge about PES                    | 5.309  | 1.468 | 0.000 |

S 2: Logistic regression examining correlation between socio-demographic variables and positive attitudes toward PES implementation in Begnas lake (Downstream)

*N=83, B=logistic correlation coefficient, SE=Standard error, p=significance*

| Factors                                | B      | SE    | P      |
|----------------------------------------|--------|-------|--------|
| Age                                    | 0.01   | 0.021 | 0.61   |
| Gender                                 | 0.39   | 0.516 | 0.448  |
| Family size                            | 0.05   | 0.123 | 0.66   |
| Distance from house to lake            | 0.003  | 0.01  | .0.769 |
| Marital status                         | 0.08   | 0.94  | 0.932  |
| Education                              | -0.002 | 0.665 | 0.965  |
| Major occupation                       | 0.17   | 0.206 | 0.402  |
| Income                                 | 0.774  | 0.362 | 0.032  |
| Living time in the area                | -0.008 | 0.016 | 0.596  |
| Ownership of house                     | -0.2   | 0.972 | 0.836  |
| Knowledge about environmental services | 0.0002 | 0.533 | 0.999  |
| Knowledge about PES                    | 0.016  | 1.331 | 0.989  |

S 3: Logistic regression examining the correlation between socio-demographic variables and positive attitudes toward participating/taking stake for PES in Begnas lake(upstream).

| Factors                                | B      | SE    | P     |
|----------------------------------------|--------|-------|-------|
| Age                                    | -0.045 | 0.03  | 0.135 |
| Gender                                 | -0.234 | 0.644 | 0.716 |
| Family size                            | -0.279 | 0.206 | 0.04  |
| Distance from house to lake            | 0.124  | 0.044 | 0.004 |
| Marital status                         | -0.236 | 0.931 | 0.799 |
| Education                              | 0.076  | 0.081 | 0.004 |
| Major occupation                       | 0.257  | 0.289 | 0.372 |
| Living time in the area                | -0.026 | 0.019 | 0.18  |
| Ownership of house                     | -3.233 | 1.96  | 0.09  |
| Knowledge about environmental services | 1.184  | 1.252 | 0.344 |
| Knowledge about PES                    | 2.672  | 0.873 | 0.002 |
| Income                                 | -1.079 | 0.681 | 0.112 |

S 4: Logistic regression examining the correlation between socio-demographic variables and attitudes toward participating/taking stake for PES in Begnas lake (Downstream)
